# Pharmacological Estrogen Administration Causes a FSH-Independent Osteo-Anabolic Effect Requiring ER Alpha in Osteoblasts

Sebastian Seitz<sup>1,9</sup>, Johannes Keller<sup>1,9</sup>, Arndt F. Schilling<sup>1,2,9</sup>, Anke Jeschke<sup>1</sup>, Robert P. Marshall<sup>1</sup>, Brenda D. Stride<sup>3</sup>, Tim Wintermantel<sup>3</sup>, Frank T. Beil<sup>1</sup>, Michael Amling<sup>1</sup>, Günther Schütz<sup>3</sup>, Jan Tuckermann<sup>4\*</sup>, Thorsten Schinke<sup>1\*</sup>

**1** Department of Osteology and Biomechanics, University Medical Center Hamburg-Eppendorf, Hamburg, Germany, **2** Department of Plastic and Hand Surgery, Technische Universität München, Munich, Germany, **3** Division Molecular Biology of the Cell I, German Cancer Research Center, Heidelberg, Germany, **4** Leibniz Institute for Age Research-Fritz Lipmann Institute, Jena, Germany

## Abstract

Postmenopausal osteoporosis is characterized by declining estrogen levels, and estrogen replacement therapy has been proven beneficial for preventing bone loss in affected women. While the physiological functions of estrogen in bone, primarily the inhibition of bone resorption, have been studied extensively, the effects of pharmacological estrogen administration are still poorly characterized. Since elevated levels of follicle-stimulating hormone (FSH) have been suggested to be involved in postmenopausal bone loss, we investigated whether the skeletal response to pharmacological estrogen administration is mediated in a FSH-dependent manner. Therefore, we treated wildtype and FSH $\beta$ -deficient (*Fshb*<sup>-/-</sup>) mice with estrogen for 4 weeks and subsequently analyzed their skeletal phenotype. Here we observed that estrogen treatment resulted in a significant increase of trabecular and cortical bone mass in both, wildtype and *Fshb*<sup>-/-</sup> mice. Unexpectedly, this FSH-independent pharmacological effect of estrogen was not caused by influencing bone resorption, but primarily by increasing bone formation. To understand the cellular and molecular nature of this osteo-anabolic effect we next administered estrogen to mouse models carrying cell specific mutant alleles of the estrogen receptor alpha (ER $\alpha$ ). Here we found that the response to pharmacological estrogen administration was not affected by ER $\alpha$  inactivation in osteoclasts, while it was blunted in mice lacking the ER $\alpha$  in osteoblasts or in mice carrying a mutant ER $\alpha$  incapable of DNA binding. Taken together, our findings reveal a previously unknown osteo-anabolic effect of pharmacological estrogen administration, which is independent of FSH and requires DNA-binding of ER $\alpha$  in osteoblasts.

**Citation:** Seitz S, Keller J, Schilling AF, Jeschke A, Marshall RP, et al. (2012) Pharmacological Estrogen Administration Causes a FSH-Independent Osteo-Anabolic Effect Requiring ER Alpha in Osteoblasts. PLoS ONE 7(11): e50301. doi:10.1371/journal.pone.0050301

**Editor:** Bin He, Baylor College of Medicine, United States of America

**Received:** July 27, 2012; **Accepted:** October 18, 2012; **Published:** November 27, 2012

**Copyright:** © 2012 Seitz et al. This is an open-access article distributed under the terms of the Creative Commons Attribution License, which permits unrestricted use, distribution, and reproduction in any medium, provided the original author and source are credited.

**Funding:** This work was supported by grants from the Deutsche Forschungsgemeinschaft given to SS (SE 1755/1-1). The funders had no role in study design, data collection and analysis, decision to publish, or preparation of the manuscript. URL: <http://www.dfg.de/index.jsp>.

**Competing Interests:** The authors have declared that no competing interests exist.

\* E-mail: [jan@fli-leibniz.de](mailto:jan@fli-leibniz.de) (JT); [schinke@uke.de](mailto:schinke@uke.de) (TS)

**9** These authors contributed equally to this work.

## Introduction

Osteoporosis results from an imbalance between bone formation and bone resorption, thereby causing bone loss and increased fracture risk [1]. One of the major risk factors of osteoporosis in women is menopause, when ovarian atrophy results in a decline of serum estrogen levels and increased bone resorption [2]. However, the cellular and molecular mechanisms of estrogen action are still insufficiently understood, and different mechanisms of action have been proposed to explain, how estrogen mediates its conserving effect on bone mass [3]. Increasing evidence suggested that physiological levels of estrogen prevent excessive bone resorption directly by regulating the life span of osteoclasts, which seem to require in part the presence of ER $\alpha$  in osteoclasts [4,5]. However, since ovarian failure is accompanied by an increase in pituitary-derived hormones, it was alternatively proposed that FSH (follicle-stimulating hormone), and not necessarily estrogen itself, is involved in hypogonadism-induced bone loss [6,7]. This hypoth-

esis was supported by the findings that hypogonadic mice lacking either the FSH receptor (*Fshr*<sup>-/-</sup>) or the FSH  $\beta$ -subunit (*Fshb*<sup>-/-</sup>) failed to develop the expected osteopenia, and that FSH administration activated osteoclast differentiation *in vitro* [8].

Although an inhibition of bone resorption is generally considered as the primary physiological function of endogenous estrogen in bone remodeling, it is surprising that the effects of estrogen administration at pharmacological doses are less well characterized, and there are several questions that have not been addressed to date. First, although estrogen supplementation at pharmacologic doses has been shown to positively affect bone mineral density and reduce fracture risk in postmenopausal women [9], it remained questionable whether this is i) mediated in a FSH-dependent manner and ii) solely attributable to an inhibitory effect on bone resorption. Second, while it has been established that estrogen receptor alpha (ER $\alpha$ ) is the relevant estrogen receptor in adult bone tissue [10], it remained unanswered, which target cell mediates the osteoanabolic effect

of estrogen administration at pharmacological doses. Third, although ER $\alpha$  is considered a dimeric nuclear receptor functioning as a transcription factor, several studies have reported ER $\alpha$  can be associated with the cell surface, where it mediates rapid biological signals independent of gene transcription, or that ER $\alpha$  acts as a transcriptional repressor by interfering with other transcription factors in its monomeric form [11–13]. In this context, it is important to state that another member of the steroid receptor family, the glucocorticoid receptor (GR), affects bone metabolism in its monomeric form independent of DNA-binding [14], whereas mechanistic insights into ER $\alpha$  signaling are still missing in regard to osteo-anabolic therapy.

In the current study, we have investigated the cellular and molecular mechanisms of the osteo-anabolic effect of pharmacological estrogen administration. For that, we implanted mice with subcutaneous estrogen pellets and analyzed their bone phenotype after 4 weeks of treatment. Our data show that estrogen treatment results in a FSH-independent increase in bone mass, which is mediated by the ER $\alpha$  in osteoblasts and primarily affects bone formation, not bone resorption. Furthermore, applying a mouse model carrying a mutation specifically disrupting DNA-binding of ER $\alpha$ , we demonstrate that the bone-anabolic effects of estrogen administration rely on this function of the ER $\alpha$  *in vivo*.

## Results

### Estrogen Administration at Pharmacological Doses Causes a FSH-independent Bone-Anabolic Effect

To analyze whether the pharmacological effect of estrogen is dependent on FSH, we treated 12 week old wildtype and *Fshb*<sup>-/-</sup> mice with estrogen for 4 weeks. As expected, *Fshb*<sup>-/-</sup> mice displayed a marked atrophy of the uterus and ovaries, which was fully normalized by estrogen treatment (Fig. 1A). Serum measurements revealed that estrogen levels were non-significantly decreased in *Fshb*<sup>-/-</sup> mice, but significantly increased approximately 10-fold in the both groups following estrogen treatment (Fig. 1A).

Contact radiography of the lumbar spine showed an increase in bone mass in wildtype and *Fshb*<sup>-/-</sup> mice receiving estrogen (Fig. 1B). Confirming previous observations [8], non-decalcified histology and static histomorphometry of spine sections revealed normal trabecular bone volume in untreated *Fshb*<sup>-/-</sup> mice, despite their hypogonadism (Fig. 1C). Likewise, no significant difference in trabecular thickness, number and spacing between untreated wildtype and *Fshb*<sup>-/-</sup> mice was observed (Fig. 1D). Importantly, both wildtype and *Fshb*<sup>-/-</sup> mice receiving estrogen treatment displayed an approximately two-fold increase in the trabecular bone volume, which was explained by a striking elevation in trabecular numbers and a reduction in trabecular spacing (Fig. 1D).

To evaluate whether similar phenotypic differences are observed in long bones, we performed cross-sectional  $\mu$ CT scanning of the femur. Again, estrogen treatment did not only increase bone mass in the femur of wildtype, but also *Fshb*<sup>-/-</sup> mice (Fig. 2A). Non-decalcified histology confirmed these results, evidenced by a significant increase in both trabecular bone volume and cortical thickness in tibiae of wildtype and *Fshb*<sup>-/-</sup> mice receiving estrogen treatment (Fig. 2B).

### Pharmacological Estrogen Administration Enhances Osteoblast Function

To understand the nature of the observed effects, we performed cellular and dynamic histomorphometry of wildtype and *Fshb*<sup>-/-</sup> mice receiving no treatment or estrogen administration. Dual calcein injections revealed that estrogen treatment led to a marked

increase of labeled surfaces and a greater distance between the labeling fronts in the vertebrae of both wildtype and *Fshb*<sup>-/-</sup> mice (Fig. 3A). Likewise, estrogen treatment resulted in a FSH-independent enhancement of calcein labeling in the tibia. Despite no alterations in osteoblast numbers in any group, both, the bone formation rate and the mineral apposition rate were markedly increased by estrogen treatment in wildtype and *Fshb*<sup>-/-</sup> mice (Fig. 3B). Increased amounts of collagen degradation products were measured in estrogen-treated mice, but assessment of bone resorption parameters failed to detect the expected change in osteoclast numbers (Fig. 3C). Following adjustment of serum crosslaps for the increase in bone mass however, estrogen-treated animals displayed no net increase in relative bone resorption, implying that the rate of bone resorption is not affected by estrogen administration at pharmacological doses.

### The Osteoanabolic Effect of Estrogen Administration is Mediated by the ER $\alpha$ in Osteoblasts and Requires its DNA-binding

In the next set of experiments we addressed the question, which cell type is primarily responsible for the observed effect of estrogen administration. For that, we took advantage of mice carrying loxP sites 5' and 3' to exon 3 of *Nr3a1* gene encoding ER $\alpha$  (ER $\alpha$ <sup>fl/fl</sup>) [15]. These were crossed with *LysM-Cre* [16] or *Runx2-Cre* [14] mice to obtain specific deletion of ER $\alpha$  in osteoclasts and osteoblasts, respectively. Compared to *Cre* negative ER $\alpha$ <sup>fl/fl</sup> controls, ER $\alpha$ <sup>LysMCre</sup> showed no changes in the trabecular bone volume, whereas ER $\alpha$ <sup>Runx2Cre</sup> displayed significantly decreased bone mass in spine and tibia sections relative to controls (Figure 4 A–C). Most importantly however, estrogen treatment of ER $\alpha$ <sup>LysMCre</sup> mice led to a marked increase of the trabecular bone volume in the spine and the tibia, while this effect was completely abolished in mice lacking ER $\alpha$  in osteoblasts.

We finally addressed the question, whether the osteo-anabolic effect of pharmacological estradiol administration requires the DNA-binding activity of ER $\alpha$ . For that purpose we took advantage of ER $\alpha$ <sup>EAAE</sup> mice, which carry an ER $\alpha$  with an exchange of the amino acid residues Y201E, K210A, K214A and R215E in the DNA binding domain of the receptor. This mutant ER is not able to bind estrogen response elements (ERE) in the promoters of target genes, but the ER $\alpha$  protein is still recruited to AP-1 binding sites [17]. Compared to their littermate controls ER $\alpha$ <sup>EAAE</sup> mice displayed a reduced trabecular bone volume in spine and tibia sections (Fig. 4 D–F). Most importantly however, the osteo-anabolic effect of pharmacological estradiol administration was completely abolished in these mice, thereby demonstrating that this effect requires the DNA-binding activity of ER $\alpha$ .

## Discussion

Although it is well established that sex steroids are powerful systemic regulators of bone remodeling [18–20], it is surprising that the cellular and molecular mechanisms of estrogen action on bone cells are still not fully clarified [3,21,22]. While it is generally accepted that the physiological function of estrogen is an inhibition of bone resorption, it remained questionable if this can solely explain the bone-anabolic effects of estrogen administration at pharmacological doses [23].

To understand the effects of pharmacologically administered estrogen, we first implanted subcutaneous pellets of estrogen into wildtype and *Fshb*<sup>-/-</sup> mice. Confirming previous reports, *Fshb*<sup>-/-</sup> mice displayed normal bone mass under basal conditions [8]. Most importantly however, estrogen administration caused an increase in bone mass in both wildtype and *Fshb*<sup>-/-</sup> mice, thereby

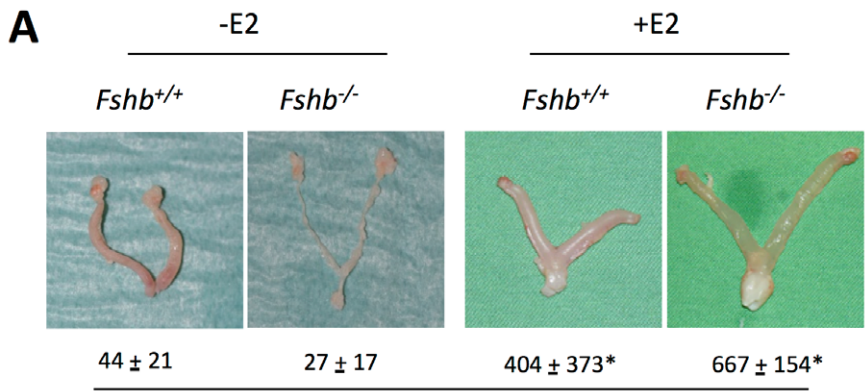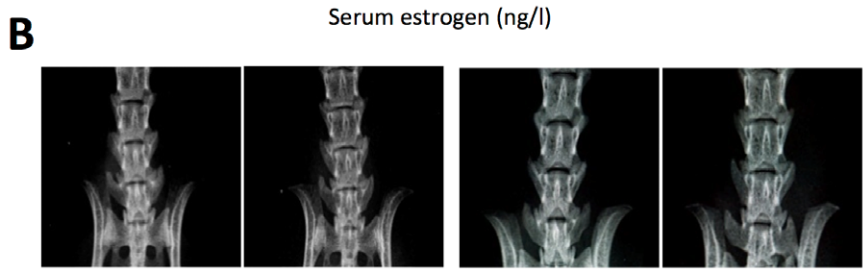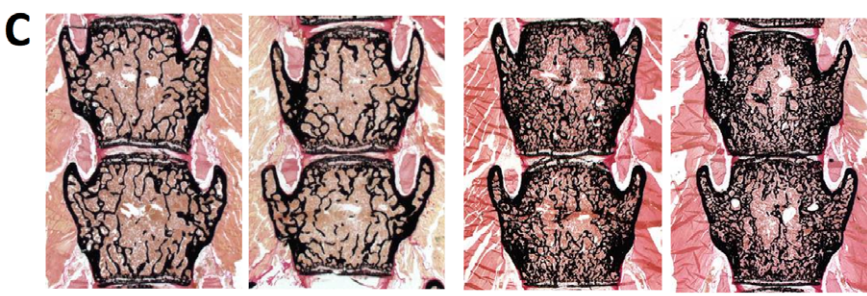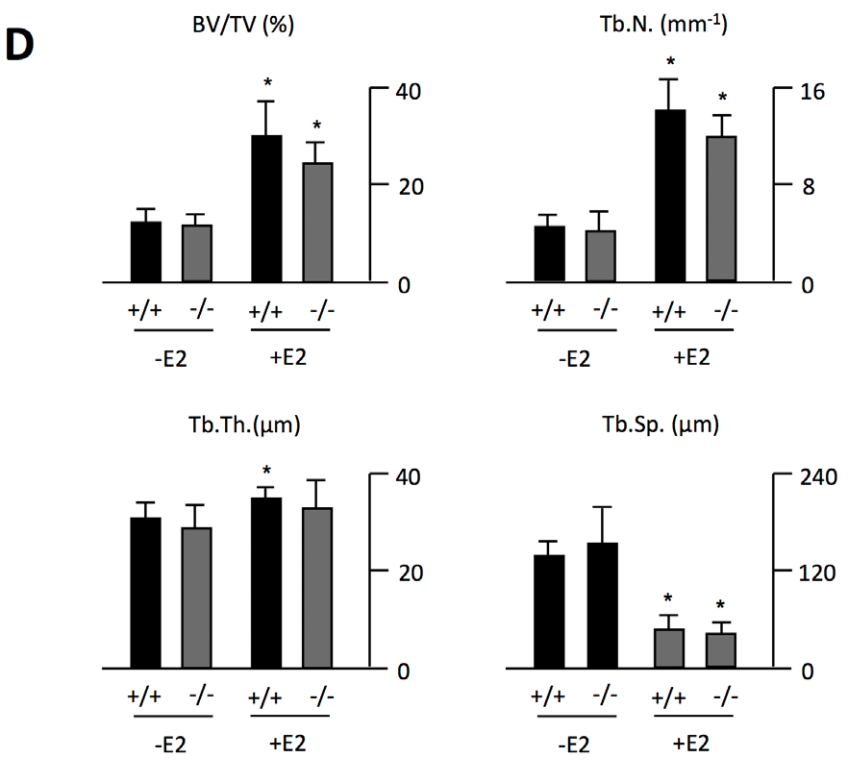

**Figure 1. Estrogen administration causes an FSH-independent increase in vertebral bone mass. A)** Gross anatomy of uteri and serum levels of estrogen in *Fshb*<sup>+/+</sup> and *Fshb*<sup>-/-</sup> mice 4 weeks after sham operation (-E2) or subcutaneous implantation of an estrogen pellet (+E2). **B)** Representative contact radiographs of the lumbar spine of the respective groups. **C)** Von Kossa/van Gieson-staining of non-decalcified spine sections and **D)** quantification of the trabecular bone volume per tissue volume (BV/TV), trabecular numbers (Tb.N), trabecular thickness (Tb.Th), and trabecular spacing (Tb.Sp). All data represent mean  $\pm$  SD from at least 5 mice per group. \**p*<0.05 versus untreated control of each genotype. doi:10.1371/journal.pone.0050301.g001

demonstrating that pharmacological estrogen administration exerts a FSH-independent bone-anabolic effect. Surprisingly, we found that estrogen treatment primarily increased bone formation parameters, while we failed to detect the expected inhibitory effect on bone resorption. In this regard, it is important to state that we used relatively young mice at the age of 12 weeks, exhibiting intact gonads and no accelerated bone resorption due to estrogen deficiency. Moreover, although hypogonadic with atrophic uteri and impaired folliculogenesis, *Fshb*<sup>-/-</sup> mice were still capable of producing estrogen and therefore do not resemble postmenopausal estrogen-deficiency in humans [24]. While this may explain the absence of an inhibitory effect of estrogen administration on bone resorption in our study, the increase in bone formation and mineral apposition rate, accounting for the striking osteo-anabolic effect, was rather unexpected.

Few studies so far have investigated the influence of estrogen treatment on osteoblast function *in vivo*. For example, it was found that, in addition to its anti-resorptive effect, estrogen specifically enhances bone formation in both healthy and ovariectomized rats [25–27]. Likewise, Nakamura et al. detected a significant increase in mineral apposition rate in ovariectomized mice implanted with estrogen pellets [5]. The observation that estrogen affects osteoblast function has also been demonstrated *in vitro*, however conflicting results have been reported. While several studies found no alteration [28] or even a decrease [29] in cell proliferation, Scheven et al. reported an increased proliferation of osteoblasts following stimulation with estrogen *in vitro* [30]. Likewise, estrogen was reported to differentially affect osteoblast differentiation and apoptosis, depending of the stage of cell maturation [31]. Furthermore, while estrogen was demonstrated to have either no effect or positively influence extracellular matrix production by cultured osteoblasts [32], experiments in our lab showed an inhibitory effect of long-term estrogen treatment on matrix mineralization (data not shown). These contradictory results may be explained by several reasons, including i) the application of highly variable immortalized cell lines and *ex vivo* culture systems of different origin and cell composition, ii) the different doses and timing of estrogen treatment in these cultures and iii) the lack of bi- or multidirectional communication between osteoblasts and osteoclasts and other cell types in most culture systems, potentially omitting cellular mediators important for estrogen action *in vivo* [33].

Given the striking osteo-anabolic effect of pharmacological estrogen administration observed *in vivo*, we thus chose to employ genetically modified mouse models to elucidate the underlying cellular mechanism. Applying transgenic mice expressing *Cre* recombinase under the control of the *LysM* or *Runx2* promoter, respectively, two previously well characterized and specific deleter strains [14,16], we targeted ER $\alpha$  in osteoblasts and cells of the osteoclast lineage. Under basal conditions, ER $\alpha$ <sup>Runx2Cre</sup> mice displayed a significantly decreased trabecular bone mass in the spine and tibiae. Most importantly however, the increase in bone mass following estrogen administration, which we observed in the corresponding control groups, was completely abolished in ER $\alpha$ <sup>Runx2Cre</sup> mice. These data clearly demonstrate that the ER $\alpha$  in osteoblasts is the responsible mediator of the osteo-anabolic effect caused by pharmacological estrogen administration.

We further addressed the question, whether intact DNA-binding of ER $\alpha$  is required for the osteo-anabolic effect of pharmacological estrogen administration. Although ER $\alpha$  is a nuclear receptor mediating most of its pleiotropic effects as a DNA-binding transcription factor, several reports have suggested that estrogen receptors are also capable of associating with the cell membrane to conduct rapid responses independent of gene expression [11,12]. Alternatively ER $\alpha$  was reported to suppress gene transcription by interfering with DNA-bound transcription factors such as AP-1 [13]. In this regard it is important to state that we have previously reported that glucocorticoid-induced bone loss still occurs in mice carrying a glucocorticoid receptor incapable of DNA-binding [14]. Based on these findings, it was indeed relevant to use the ER $\alpha$ <sup>EAAE</sup> mouse model in order to evaluate, whether estrogen-induced bone formation would also be independent of DNA-binding. Here we found that ER $\alpha$ <sup>EAAE</sup> mice did not respond to the osteo-anabolic effect of estrogen administration. Therefore, although monomeric ER $\alpha$  signaling may be of relevance in some tissues [34], our data demonstrate that DNA-binding of ER $\alpha$  is required for pharmacologic effects of estrogen on bone mass.

Of interest, the applied treatment regimen in this study positively affected bone volume in both spine and long bones. This is clinically relevant, since fractures of the femur are associated with higher mortality than vertebral fractures [35]. At this point, the only FDA-approved osteo-anabolic substance for the treatment of bone loss disorders is Teriparatide, which requires daily injections for its beneficial action [36]. However, given the superior possibilities of estrogen delivery (e.g. orally, long-lasting patch) and its robust osteo-anabolic effect observed in this study, it may be acceptable to reconsider a temporary bone mass enhancement by estrogen treatment in selected postmenopausal women at high risk for osteoporotic fractures. Larger studies are required to evaluate if a relatively short-term treatment would outweigh the adverse effects of estrogen and SERM administration, such as an increased risk for uterine malignancies and venous thromboembolic events [37,38].

## Materials and Methods

### Mice

*Fshb*<sup>+/-</sup> mice were obtained from the Jackson Laboratory (#003283) and genotyping was performed as described previously [24]. Due to the infertility of *Fshb*<sup>-/-</sup> females, we only used wildtype and *Fshb*<sup>+/-</sup> littermates derived from *Fshb*<sup>+/-</sup> matings for our analysis. The generation and genotyping of ER $\alpha$ <sup>fl/fl</sup> and ER $\alpha$ <sup>EAAE</sup> mice has been described previously [15,17]. The local authorities of Hamburg, Germany (Free and Hanseatic City of Hamburg, Germany; Public health authority; Veterinary Office; File reference: G8151/591-00.33, No. 16/2000) approved all experiments.

### Surgical Procedure

For estrogen treatment 12 week old female mice of each genotype were implanted with an estrogen pellet (Innovative Research of America, Sarasota, FL, with a release rate of 0.36  $\mu$ g/day) in the scapular region behind the neck. Due to the preantral stage block in folliculogenesis in female *Fshb*<sup>-/-</sup> mice, synchro-

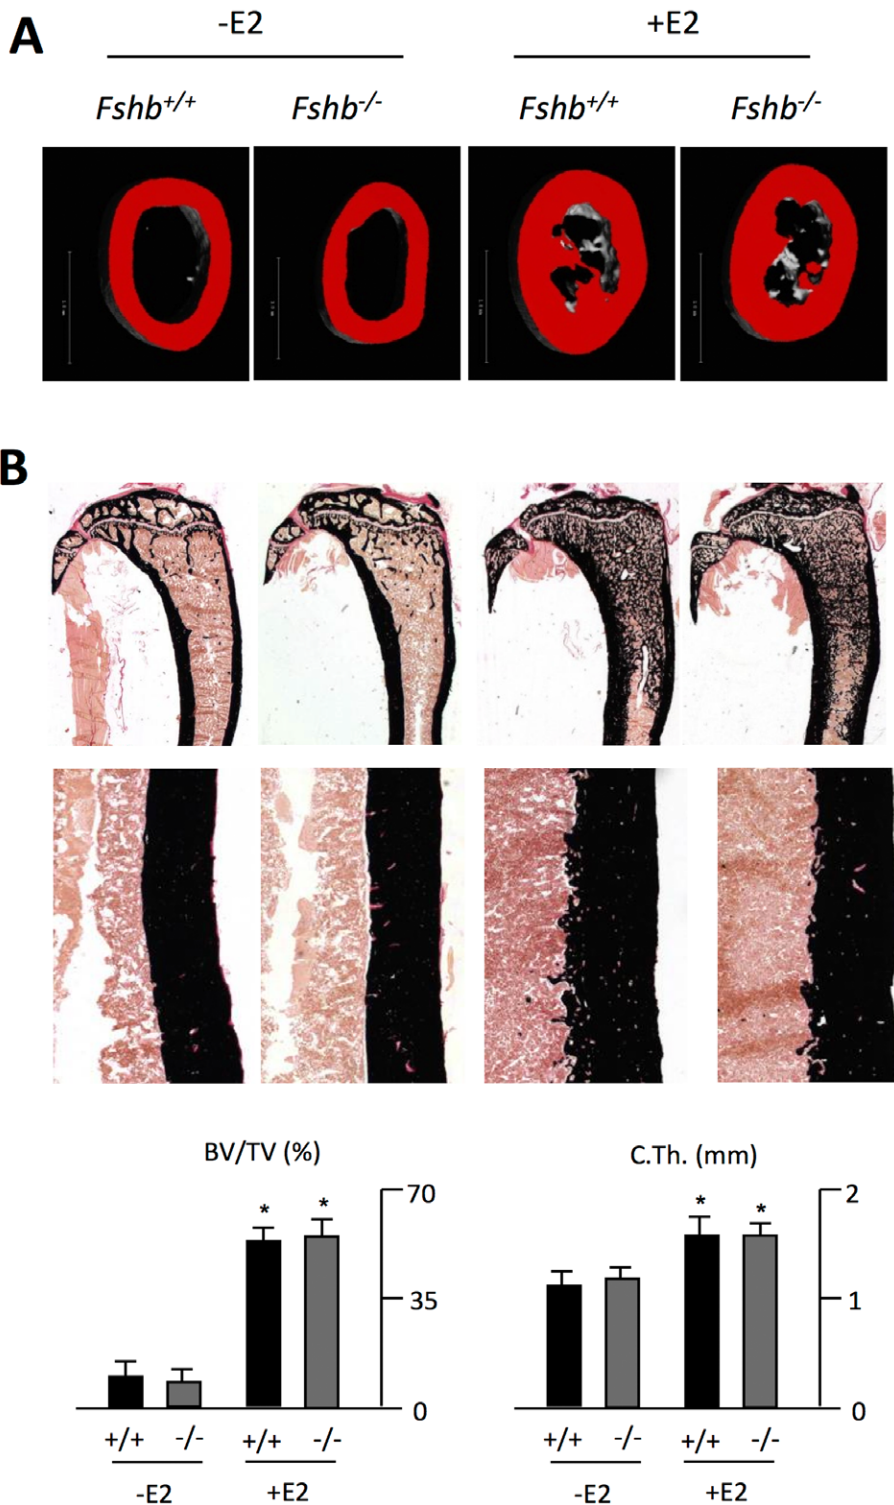

**Figure 2. Estrogen administration increases bone mass in long bones independent of FSH.** **A)** Representative cross-sectional  $\mu$ CT scans of the femoral diaphyses of untreated (-E2) or treated (+E2) *Fshb*<sup>+/+</sup> and *Fshb*<sup>-/-</sup> mice. **B)** Von Kossa/van Gieson-staining of non-decalcified tibia sections and quantification of the BV/TV and cortical thickness (C.Th.). All data represent mean  $\pm$  SD from at least 5 mice per group. \* $p < 0.05$  versus untreated control of each genotype.  
doi:10.1371/journal.pone.0050301.g002

nization of the reproductive status was not performed prior to surgery. To assess dynamic histomorphometric indices estrogen-treated and sham-operated mice were given two injections of

calcein 9 days and 2 days before sacrifice. Radiographic and histologic analyses were performed after a treatment period of 4 weeks. To evaluate the impact of estrogen treatment on the

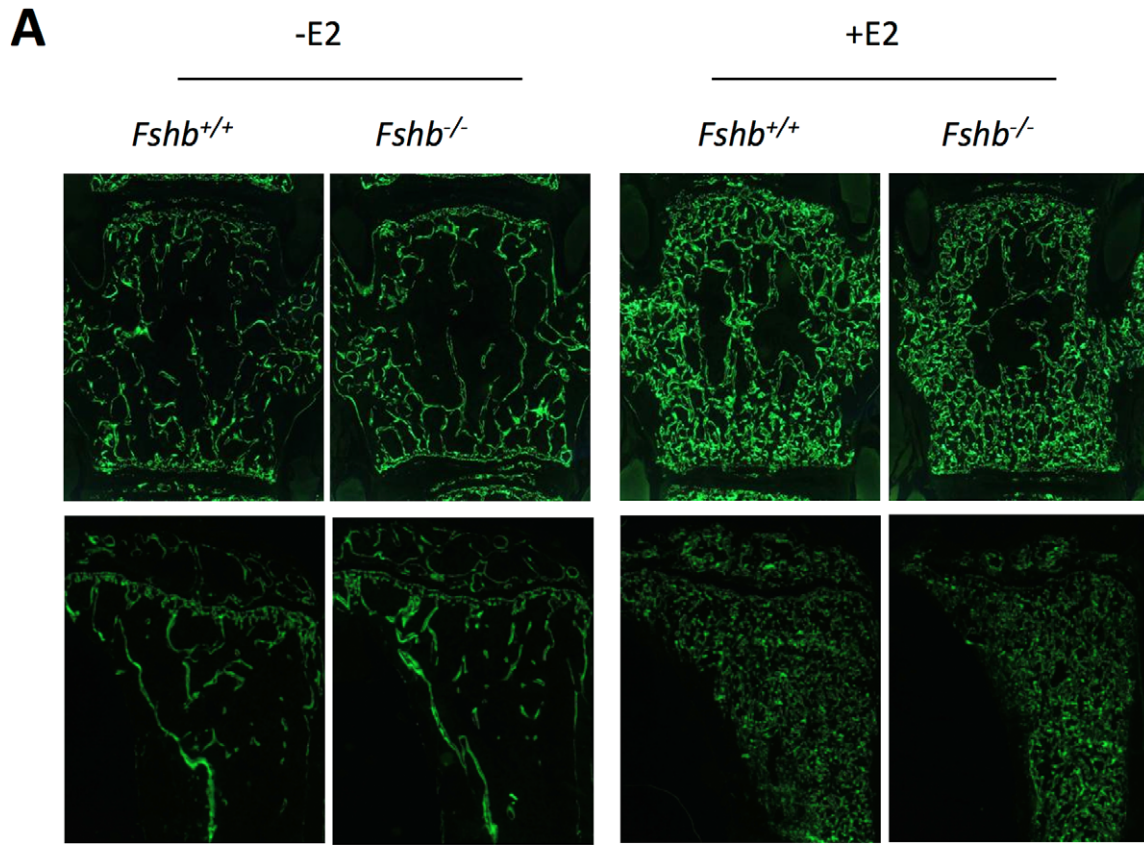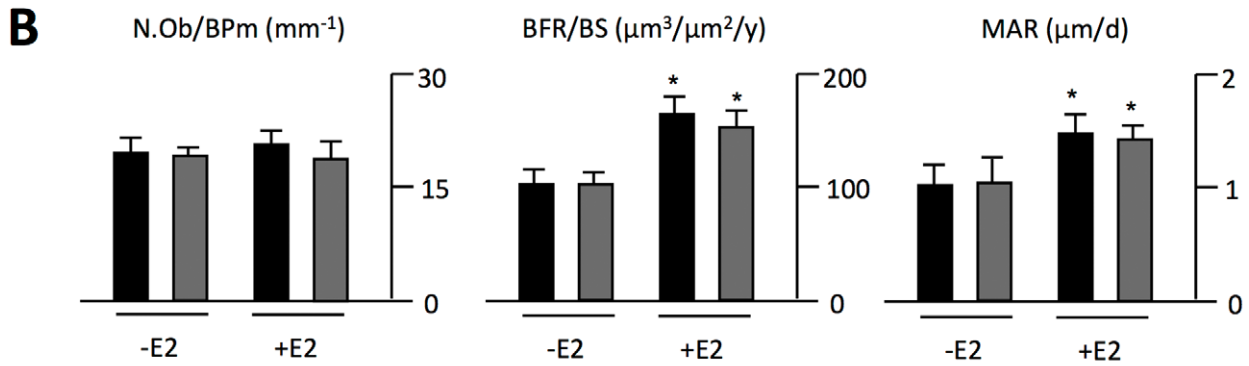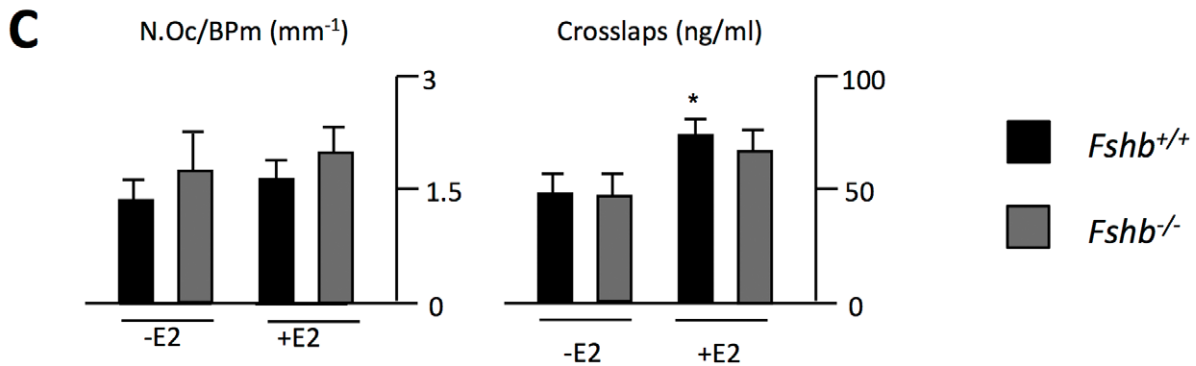

**Figure 3. Estrogen treatment at pharmacologic doses increases osteoblast function independent of FSH.** **A)** Fluorescent micrographs of non-decalcified spine (top) and tibia sections (bottom) of *Fshb*<sup>+/+</sup> and *Fshb*<sup>-/-</sup> mice 4 weeks after sham operation (-E2) or implantation of an estrogen pellet (+E2). **B)** Quantification of number of osteoblasts per bone perimeter (N.Oc/BPm), bone formation rate per bone surface (BFR/BS) and mineral apposition rate (MAR) in *Fshb*<sup>+/+</sup> and *Fshb*<sup>-/-</sup> mice. **C)** Quantification of number of osteoclasts per bone perimeter (N.Oc/BPm) and serum levels of collagen degradation products (Crosslaps) in the same groups. All data represent mean ± SD from at least 5 mice per group. \*p<0.05 versus untreated control of each genotype. doi:10.1371/journal.pone.0050301.g003

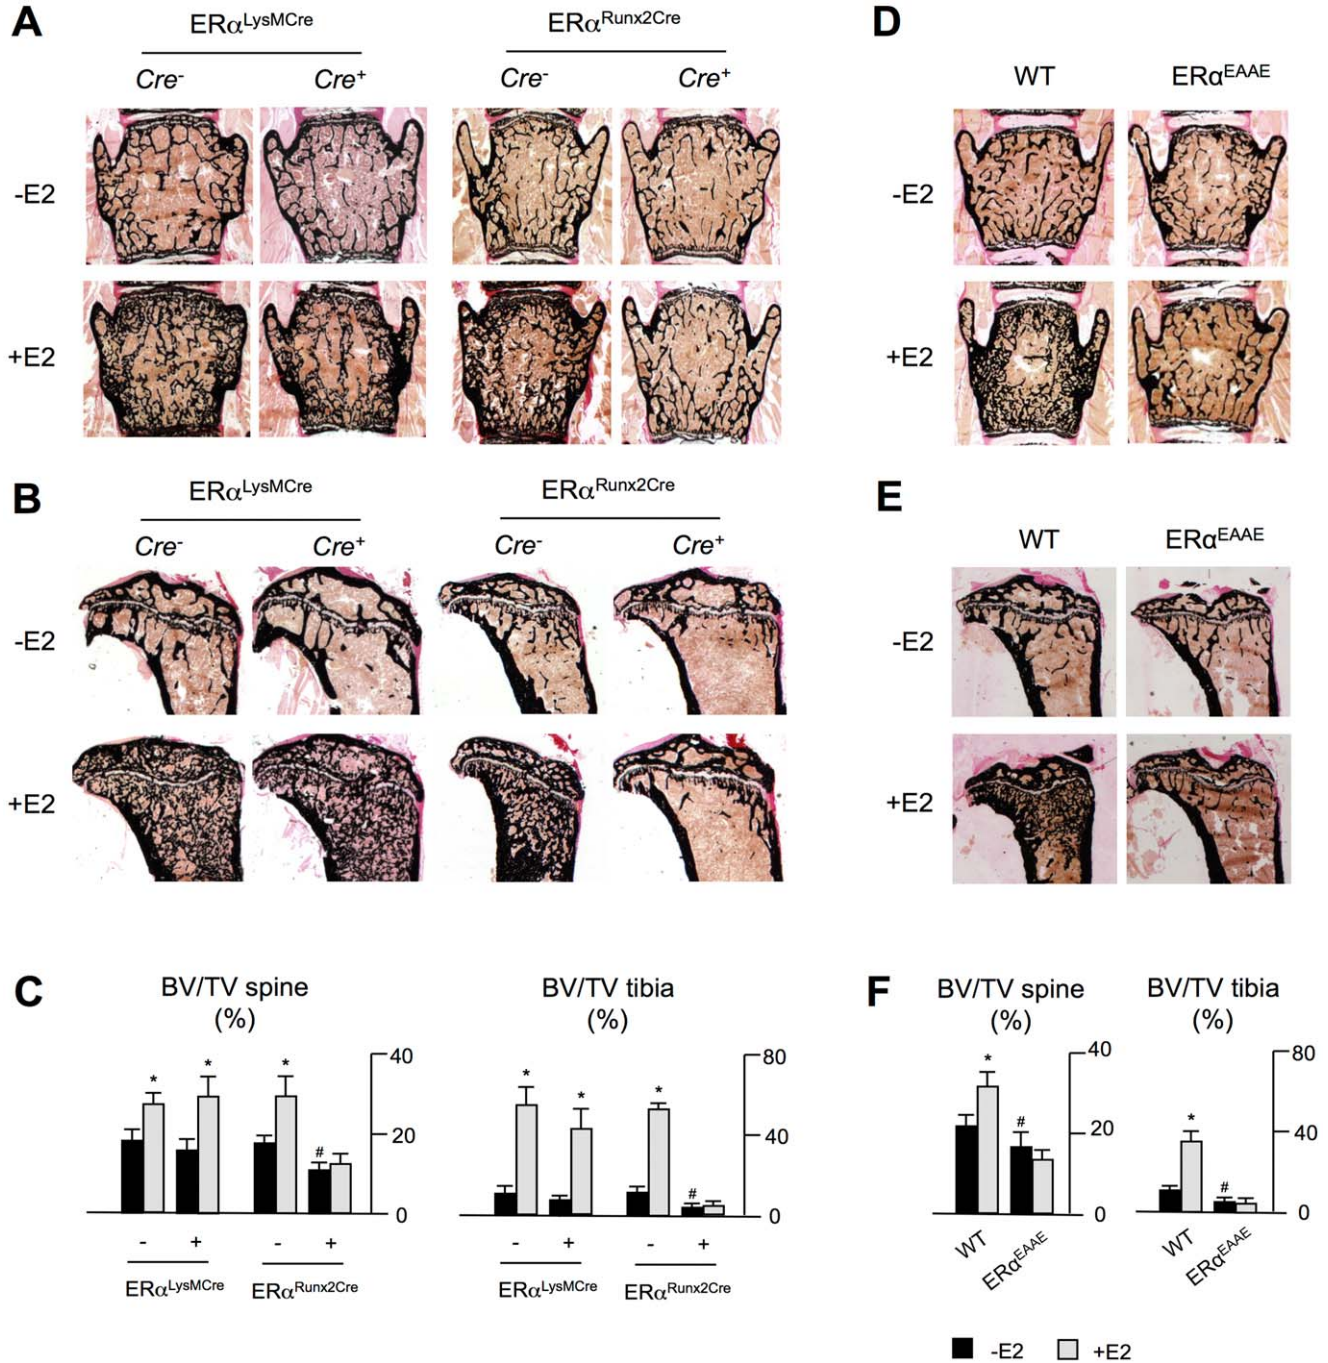

**Figure 4. The osteo-anabolic effect of estrogen administration requires DNA-binding of ERα in osteoblasts.** Von Kossa/van Gieson-staining of non-decalcified spine **A)** and tibia **B)** sections of *ERα*<sup>f/f</sup> mice carrying the *LysM-Cre* or the *Runx2-Cre* transgene, receiving the same treatment. **C)** Quantification of BV/TV in *ERα*<sup>LysMCre</sup> and *ERα*<sup>Runx2Cre</sup> mice receiving no treatment or estrogen treatment. Von Kossa/van Gieson-staining of non-decalcified spine **D)** and tibia **E)** sections of *ERα*<sup>EAAE</sup> mice receiving no (-E2) or estrogen (+E2) treatment. **F)** Quantification of BV/TV in *ERα*<sup>EAAE</sup> mice receiving no treatment or estrogen treatment. All data represent mean ± SD from at least 4 mice per group. #p<0.05 versus control under basal conditions; \*p<0.05 versus control following estrogen treatment. doi:10.1371/journal.pone.0050301.g004

gonads, the size of the ovaries was monitored immediately after sacrifice.

### Radiographic and $\mu$ CT Analyses

After removal of internal organs, the whole skeletons were fixed in formalin as described previously [39]. Skeletons were subsequently analyzed by contact radiography using a Faxitron X-ray cabinet (Faxitron X-ray Corp., Wheeling, IL, USA). To determine the cortical thickness, cross-sectional scans of the femur were performed using a  $\mu$ CT 40 (ScancoMedical, Bassersdorf, Switzerland) at a resolution of 10  $\mu$ m. The raw data were manually segmented and analyzed with the  $\mu$ CT Evaluation Program V4.4A (Scanco Medical). For visualization, the segmented data were imported and displayed in  $\mu$ CT Ray V3.0 (Scanco Medical).

### Non-decalcified Histology

After an incubation in 70% ethanol for 24 hours, the lumbar vertebral bodies L2 to L5 and one tibia of each mouse were dehydrated in ascending alcohol concentrations and embedded in methylmethacrylate as described previously [40]. Sections of 4  $\mu$ m thickness were cut in the sagittal plane on a Microtec rotation microtome (Techno-Med, Munich, Germany). These sections were stained with toluidine blue and by the von Kossa/van Gieson procedure as described [40]. Nonstained sections of 12  $\mu$ m were used to determine bone formation rate.

### Histomorphometry

Histomorphometric quantification was performed on toluidine blue-stained sections. Analysis of the trabecular bone volume (BV/TV), trabecular thickness (TbTh), trabecular number (TbN), trabecular spacing (TbSp), and the determination of osteoblast and osteoclast numbers (Ob.N/BPm; Oc.N/BPm) were carried out

using the Osteo-Measure histomorphometry system (Osteometrics, Atlanta, GA, USA) according to the guidelines of the American Society for Bone and Mineral Research [41]. The bone formation rate and mineral apposition rate was determined by fluorescence microscopy on 12  $\mu$ m thick sections.

### Serum Analysis

Estrogen levels were determined by the Exciting Systems (Roche/Hitachi Modular Analytics Hybrid; Roche Diagnostics, Mannheim, Germany) at the Institute of Clinical Chemistry, University Medical Center Hamburg-Eppendorf, Hamburg, Germany. To evaluate the rate of bone resorption we quantified the serum concentrations of collagen degradation products (Crosslaps) by ELISA (Immunodiagnostic systems, #AC-06F1).

### Statistics

All data are presented as mean $\pm$ SD. Statistical analyses of the results were performed using two-way-ANOVA (IBM SPSS Statistics 20). Statistical differences were considered significant when  $p < 0.05$ .

### Acknowledgments

We thank O. Winter and G. Arndt for technical assistance. We would like to acknowledge Dr. Michelle Morales for critically reading the manuscript.

### Author Contributions

Conceived and designed the experiments: MA GS JT TS. Performed the experiments: SS JK AFS AJ RPM BDS FTB TW. Analyzed the data: JK JT TS. Wrote the paper: JK JT TS.

### References

- Zaidi M (2007) Skeletal remodeling in health and disease. *Nat Med* 7: 791–801.
- Lindsay R (2004) Hormones and bone health in postmenopausal women. *Endocrine* 3: 223–30.
- Baron R (2006) FSH versus estrogen: who's guilty of breaking bones? *Cell Metab* 5: 302–5.
- Takada I, Tsuji N, Youn MY, Fujiyama S, Okada M, et al. (2010) Purification and identification of estrogen receptor alpha co-regulators in osteoclasts. *Ann N Y Acad Sci*. 1192: 201–7.
- Nakamura T, Imai Y, Matsumoto T, Sato S, Takeuchi K, et al. (2007) Estrogen prevents bone loss via estrogen receptor alpha and induction of Fas ligand in osteoclasts. *Cell* 5: 811–23.
- Yeh JK, Chen MM, Aloia JF (1996) Ovariectomy-induced high turnover in cortical bone is dependent on pituitary hormone in rats. *Bone* 5: 443–50.
- Yeh JK, Chen MM, Aloia JF (1997) Effects of 17 beta-estradiol administration on cortical and cancellous bone of ovariectomized rats with and without hypophysectomy. *Bone* 5: 413–20.
- Sun L, Peng Y, Sharrow AC, Iqbal J, Zhang Z, et al. (2006) FSH directly regulates bone mass. *Cell* 2: 247–60.
- Goltzman D (2002) Discoveries, drugs and skeletal disorders. *Nat Rev Drug Discov* 10: 784–96.
- Nilsson S, Gustafsson JÅ (2011) Estrogen receptors: therapies targeted to receptor subtypes. *Clin Pharmacol Ther* 89: 44–55.
- Levin ER (2009) Plasma membrane estrogen receptors. *Trends Endocrinol Metab* 20: 477–482.
- Maggiolini M, Picard D (2010). The unfolding stories of GPR30, a new membrane bound estrogen receptor. *J Endocrinol* 204: 105–114.
- O'Brien JE, Peterson TJ, Tong MH, Lee EJ, Pfaff LE, et al. (2006) Estrogen-induced Proliferation of Uterine Epithelial Cells Is Independent of Estrogen Receptor Binding to Classical Estrogen Response Elements. *J Biol Chem* 281: 26683–26692.
- Rauch A, Seitz S, Baschant U, Schilling AF, Illing A, et al. (2010) Glucocorticoids suppress bone formation by attenuating osteoblast differentiation via the monomeric glucocorticoid receptor. *Cell Metab* 11: 517–531.
- Wintermantel TM, Campbell RE, Porteous R, Bock D, Gröne HJ, et al. (2006) Definition of estrogen receptor pathway critical for estrogen positive feedback to gonadotropin-releasing hormone neurons and fertility. *Neuron* 52: 271–80.
- Clausen BE, Burkhardt C, Reith W, Renkawitz R, Förster I (1999) Conditional gene targeting in macrophages and granulocytes using *LysMcre* mice. *Transgenic Res* 8: 265–277.
- Ahlbory-Dieker DL, Stride BD, Leder G, Schkoldow J, Trölenberg S, et al. (2009) DNA binding by estrogen receptor-alpha is essential for the transcriptional response to estrogen in the liver and the uterus. *Mol Endocrinol* 10: 1544–55.
- Martin TJ, Gaddy D (2006) Bone loss goes beyond estrogen. *Nat Med* 6: 612–3.
- Pacifici R (1996) Estrogen, cytokines, and pathogenesis of postmenopausal osteoporosis. *J Bone Miner Res* 11: 1043–1051.
- Manolagas SC (2000) Birth and death of bone cells: Basic regulatory mechanisms and implications for the pathogenesis and treatment of osteoporosis. *Endocr Rev* 21: 115–137.
- McCauley LK, Tözüm TF, Rosol TJ (2002) Estrogen receptors in skeletal metabolism: lessons from genetically modified models of receptor function. *Crit Rev Eukaryot Gene Expr* 2: 89–100.
- Windahl SH, Andersson G, Gustafsson JA (2002) Elucidation of estrogen receptor function in bone with the use of mouse models. *Trends Endocrinol Metab* 5: 195–200.
- Tobias JH, Compston JE (1999) Does estrogen stimulate osteoblast function in ostenopausal women? *Bone* 2: 121–4.
- Kumar TR, Wang Y, Lu N, Matzuk MM (1997) Follicle stimulating hormone is required for ovarian follicle maturation but not male fertility. *Nat Genet* 2: 201–4.
- Chow J, Tobias JH, Colston KW, Chambers TJ (1992) Estrogen maintains trabecular bone volume in rats not only by suppression of bone resorption but also by stimulation of bone formation. *J Clin Invest* 1: 74–8.
- McDougall KE, Perry MJ, Gibson RL, Colley SM, Korach KS, et al. (2003) Estrogen receptor-alpha dependency of estrogen's stimulatory action on cancellous bone formation in male mice. *Endocrinology* 5: 1994–9.
- Samuels A, Perry MJ, Goodship AE, Fraser WD, Tobias JH (2000) Is high-dose estrogen-induced osteogenesis in the mouse mediated by an estrogen receptor? *Bone* 1: 41–6.
- Keeting PE, Scott RE, Colvard DS, Han IK, Spelsberg TC, et al. (1991) Lack of a direct effect of estrogen on proliferation and differentiation of normal human osteoblast-like cells. *J Bone Miner Res* 3: 297–304.



29. Robinson JA, Harris SA, Riggs BL, Spelsberg TC (1997) Estrogen regulation of human osteoblastic cell proliferation and differentiation. *Endocrinology* 7: 2919–27.
30. Scheven BA, Damen CA, Hamilton NJ, Verhaar HJ, Duursma SA (1992) Stimulatory effects of estrogen and progesterone on proliferation and differentiation of normal human osteoblast-like cells in vitro. *Biochem Biophys Res Commun.* 1: 54–60.
31. Krum SA (2011) Direct transcriptional targets of sex steroid hormones in bone. *J Cell Biochem* 2: 401–8.
32. Qu Q, Perälä-Heape M, Kapanen A, Dahllund J, Salo J, et al. (1998) Estrogen enhances differentiation of osteoblasts in mouse bone marrow culture. *Bone* 3: 201–9.
33. Martin T, Gooi JH, Sims NA (2009) Molecular mechanisms in coupling of bone formation to resorption. *Crit Rev Eukaryot Gene Expr* 1: 73–88.
34. Falkenstein E, Wehling M (2000) Nongenomically initiated steroid actions. *Eur J Clin Invest Suppl* 3: 51–4.
35. Cummings-Vaughn LA, Gammack JK (2011) Falls, osteoporosis, and hip fractures. *Med Clin North Am* 95: 495–506.
36. Mosekilde L, Tørring O, Rejnmark L (2011) Emerging anabolic treatments in osteoporosis. *Curr Drug Saf* 2: 62–74.
37. Women's Health Initiative Steering Committee (2004) Effects of conjugated equine estrogen in postmenopausal women with hysterectomy: the Women's Health Initiative randomized controlled trial. *JAMA* 291: 1701–12.
38. Writing Group for the Women's Health Initiative Investigators (2002) Risks and benefits of estrogen plus progestin in healthy postmenopausal women: principal results from the Women's Health Initiative randomized controlled trial. *JAMA* 288: 321–33.
39. Schinke T, Schilling AF, Baranowsky A, Seitz S, Marshall RP, et al. (2009) Impaired gastric acidification negatively affects calcium homeostasis and bone mass. *Nat Med* 6: 674–81.
40. Schulze J, Bickert T, Beil FT, Zaiss MM, Albers J, et al. (2011) Interleukin-33 is expressed in differentiated osteoblasts and blocks osteoclast formation from bone marrow precursor cells. *J Bone Miner Res* 4: 704–17.
41. Parfitt AM, Drezner MK, Glorieux FH, Kanis JA, Malluche H, et al. (1987) Bone Histomorphometry: Standardization of Nomenclature, Symbols, and Units: Report of the ASBMR Histomorphometry Nomenclature Committee. *J Bone Miner Res* 6: 595–610.
